# Supplementary material for: Radiation-induced gliomas represent H3-/IDH-wild type pediatric gliomas with recurrent PDGFRA amplification and loss of CDKN2A/B
Source: PubMed Central journal article supplement (PMC8452680; doi:10.1038/s41467-021-25708-y), 2021-09-20
Supplement: 41467_2021_25708_MOESM1_ESM.pdf [file 41467_2021_25708_MOESM1_ESM.pdf]

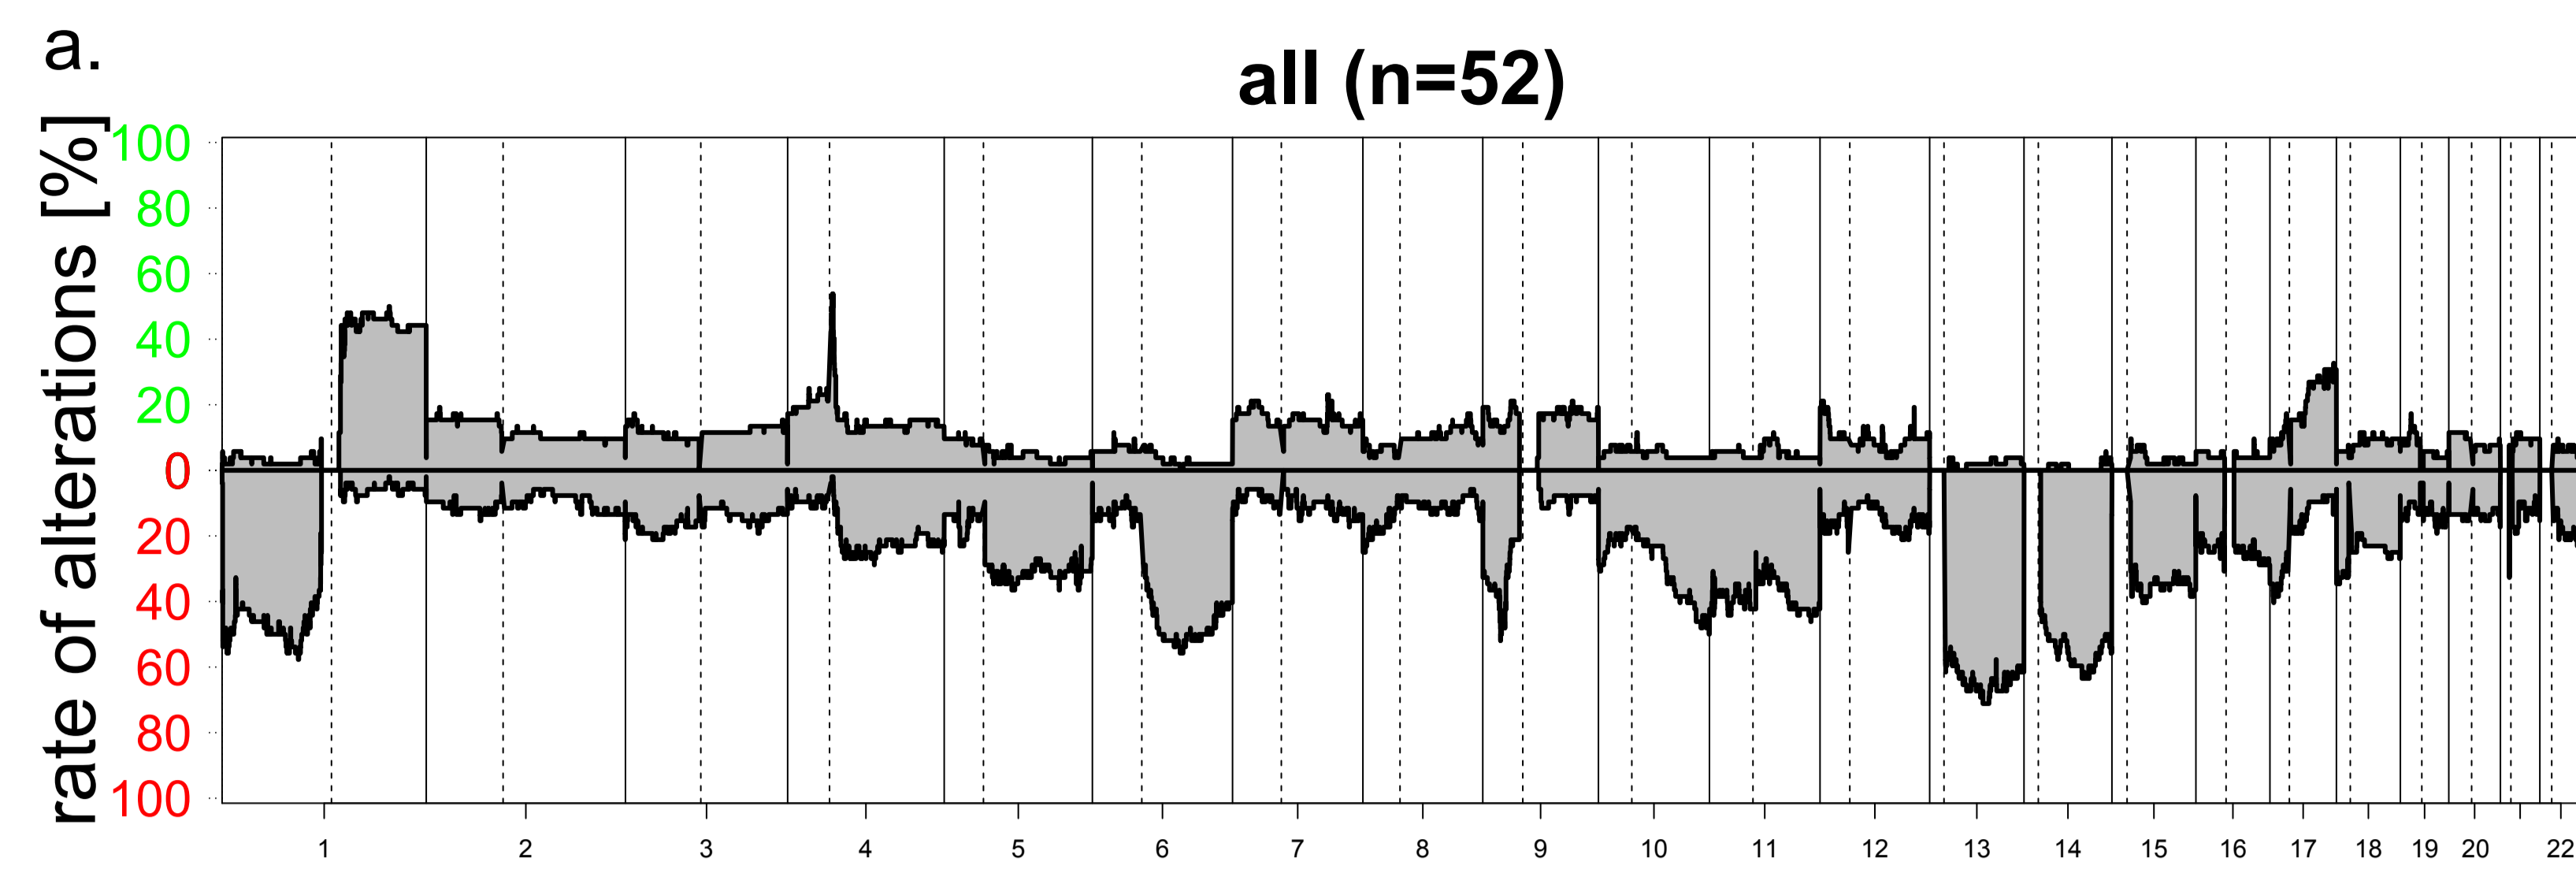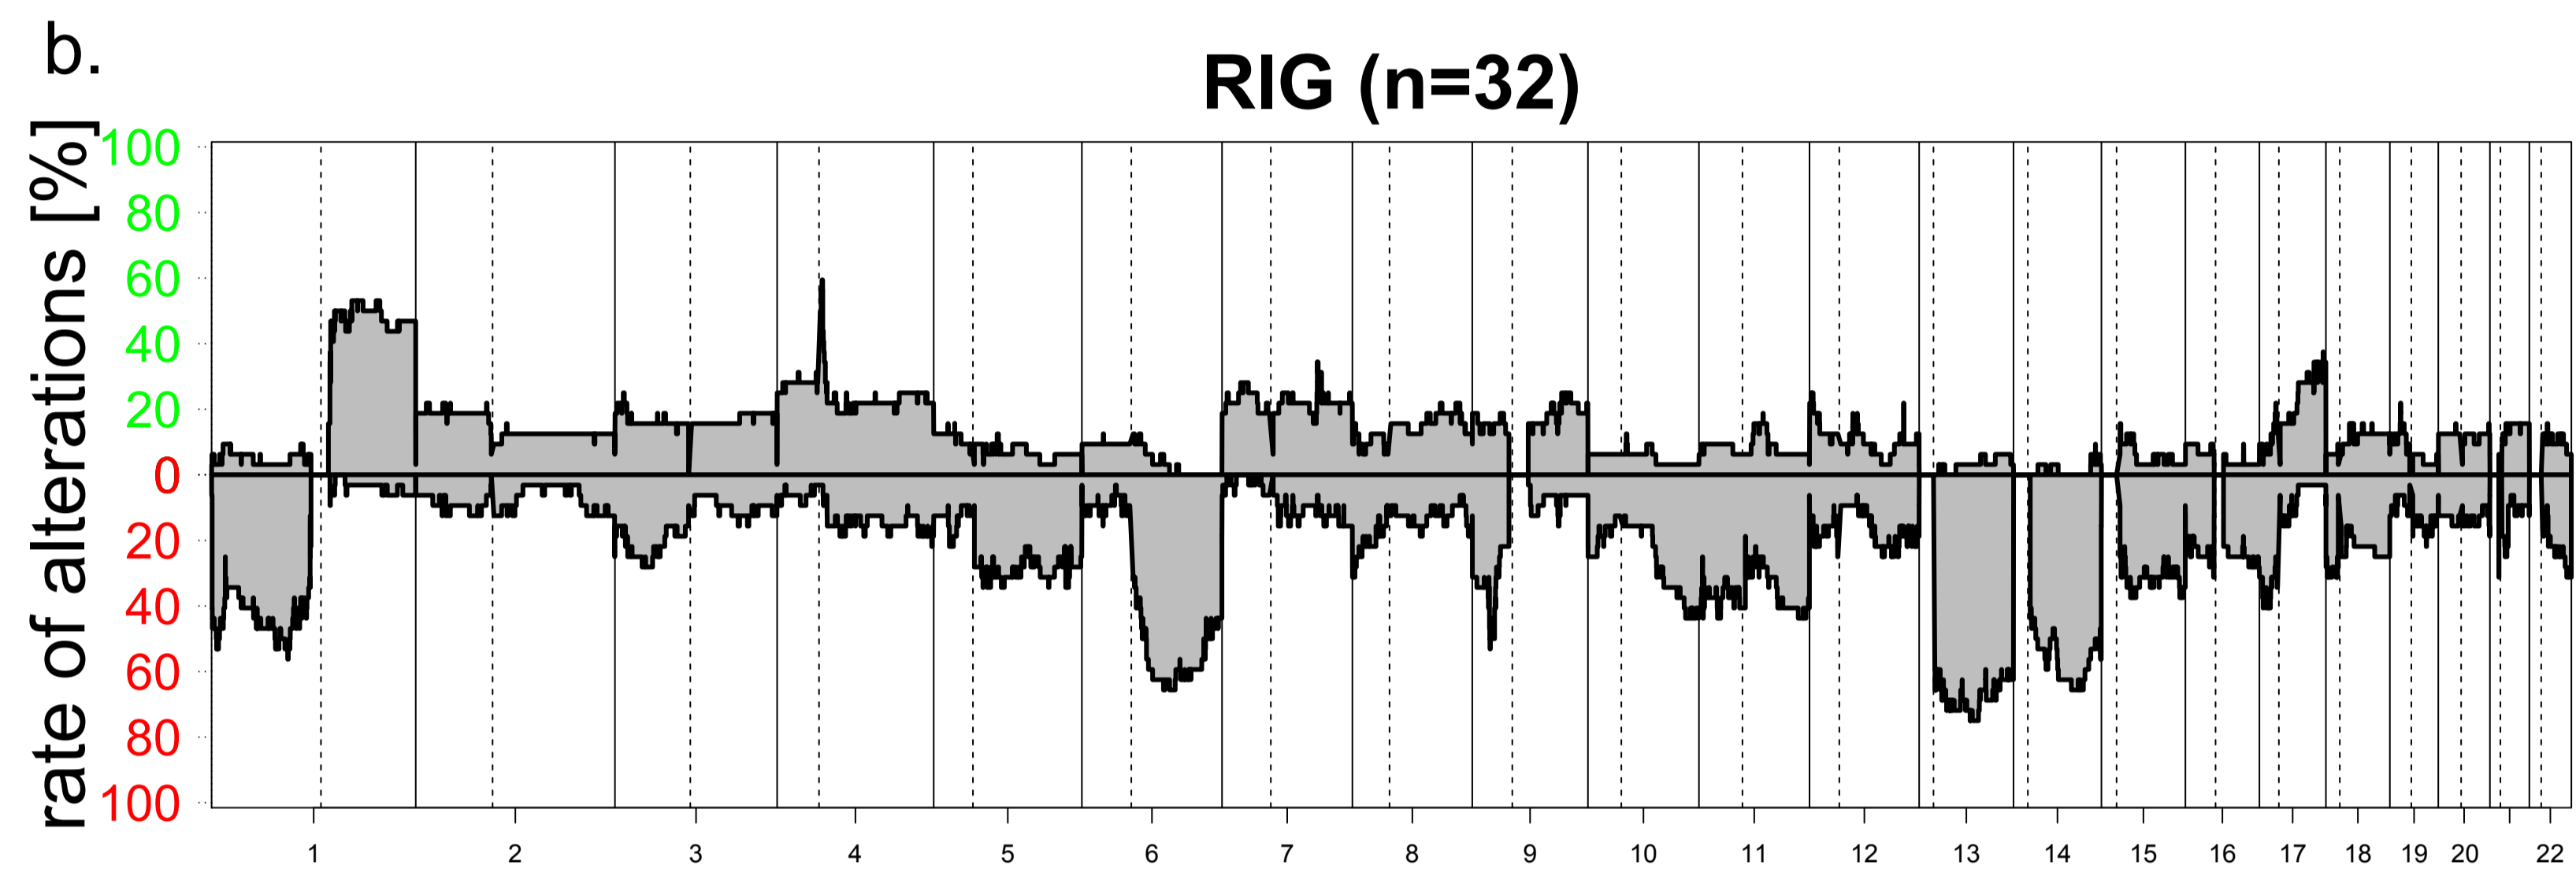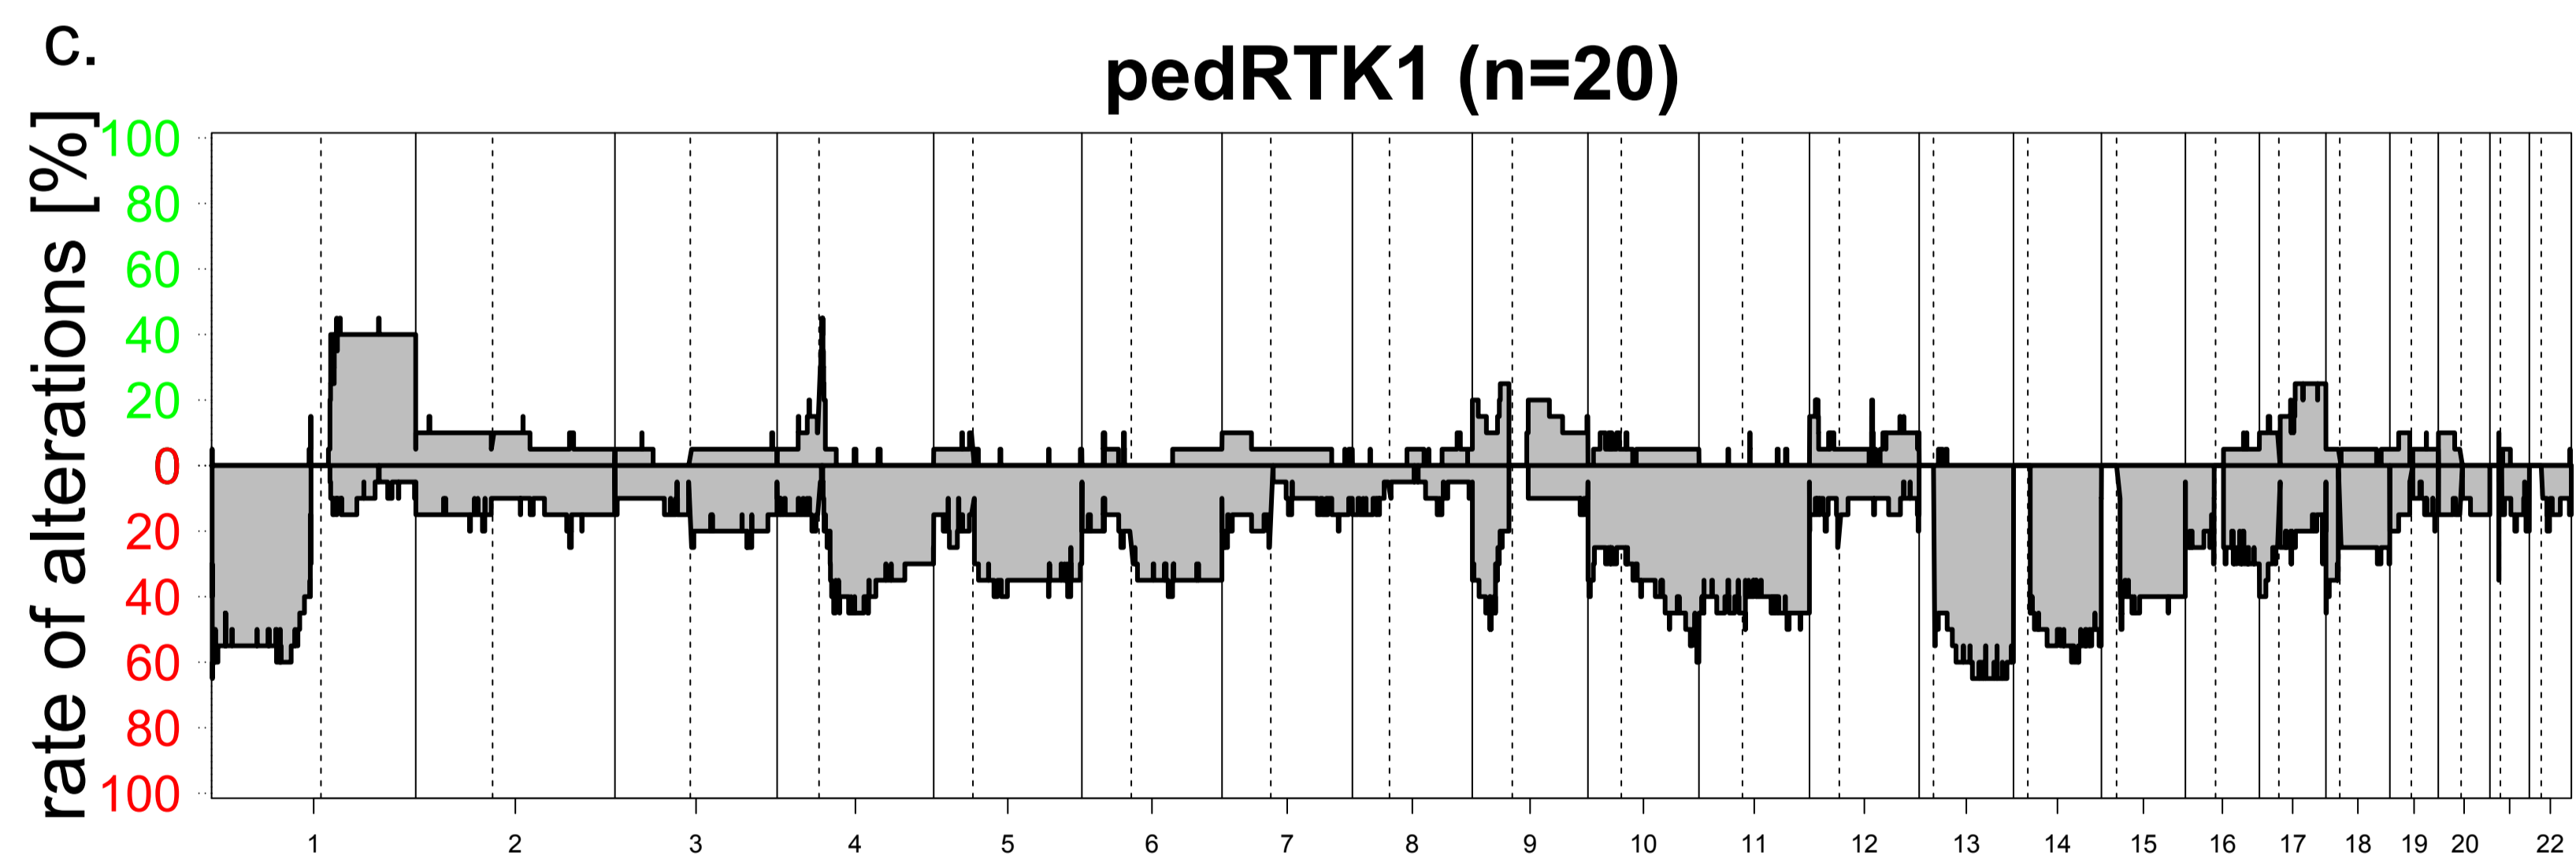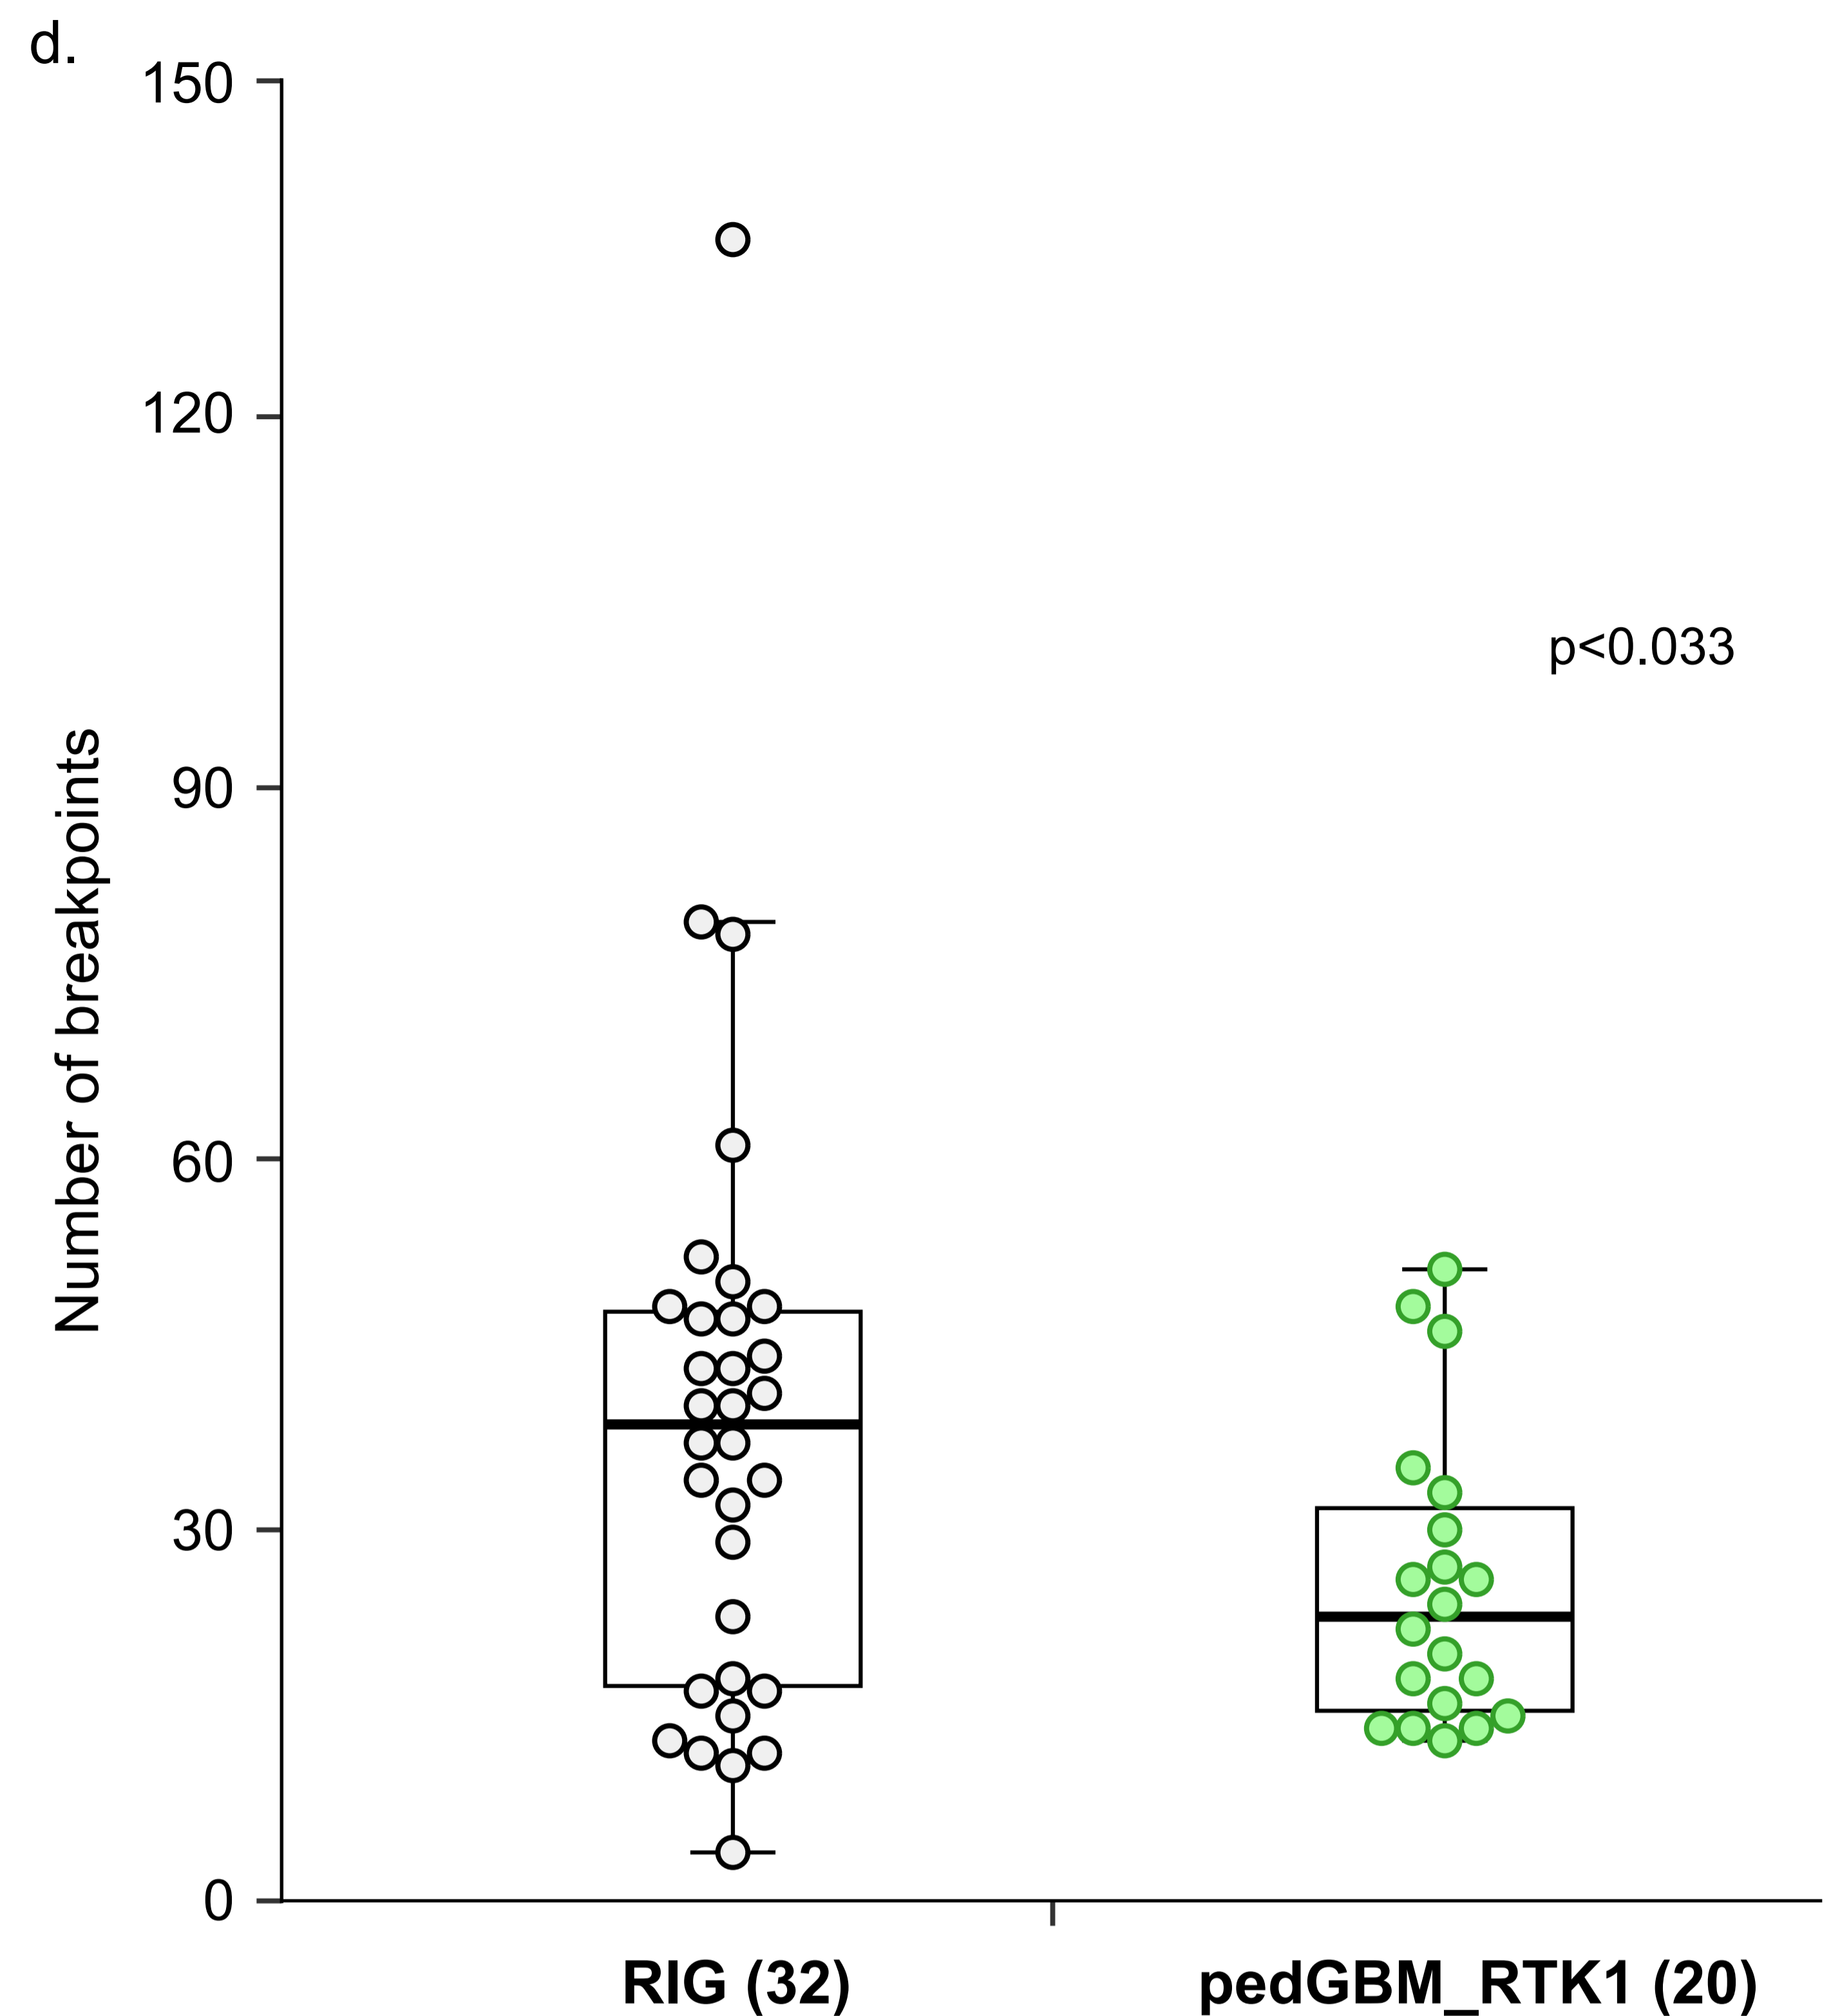

**Supplementary Figure 1.** Comparison of copy-number changes between RIGs (n=32) and non-RIG pedGBM\_RTK1 tumors (n=20) reveal similar chromosomal gains and losses across all autosomal chromosomes (a-c). Number of chromosomal breakpoints in RIGs (n=32) and non-RIG pedGBM\_RTK1 tumors (n=20) were manually counted through visual inspection of the single-case copy number plots (d). Data points are illustrated as boxplots with the median as middle line and bounds of boxes constraining the interquartile range. Lower and upper whiskers constrain data points between minimum and maximum. Outliers are depicted using individual data points beyond the whiskers. A statistical comparison between the RIG and non-RIG tumors was performed with a 2-sided t-test. If certain tumor samples display >10 breakpoints on a single chromosome, this particular chromosome received the value of 10 to avoid an exceedingly high overall number of breakpoints for the whole tumor. Overall, RIGs display a wider range and a significantly higher number of chromosomal breakpoints (median: 38.5, range: 4-134) compared to non-RIG pedGBM\_RTK1 tumors (median: 23, range: 13-51; two-sided t-test:  $p=0.03319$ ).

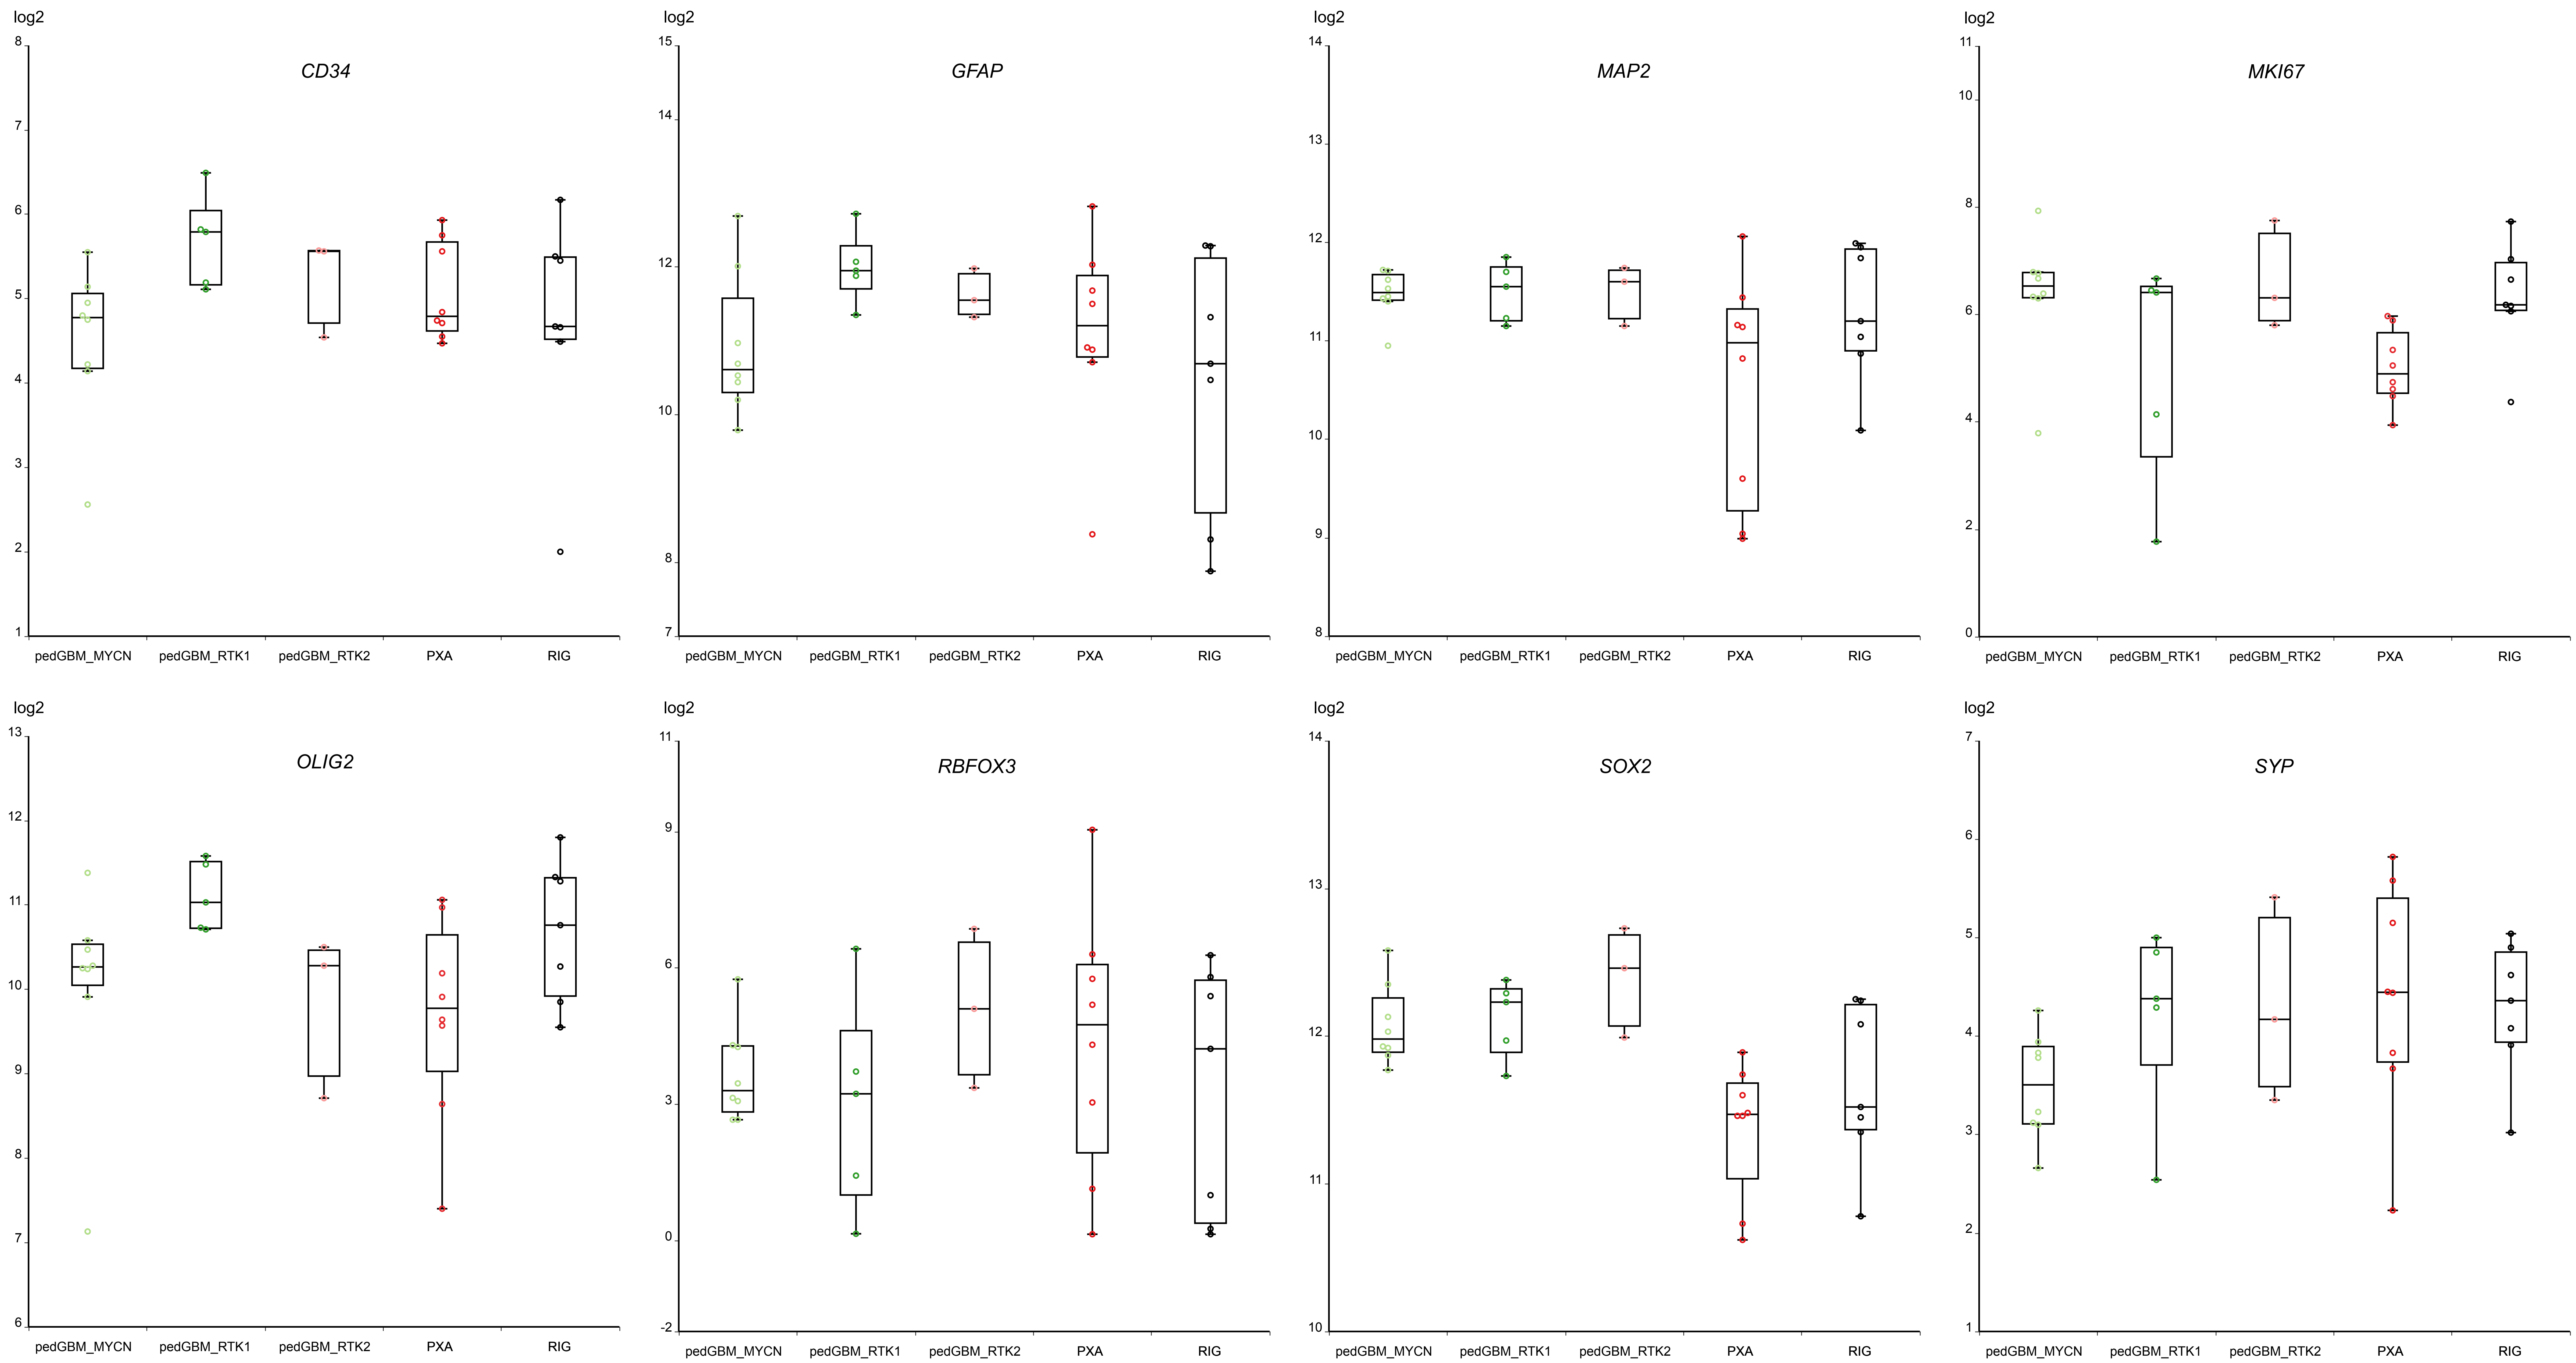

**Supplementary Figure 2** Level of expression in glioma-characteristic genes comparing RIG samples (n=7) with pediatric glioblastoma subclass MYCN (pedGBM\_MYCN, n=8), pediatric glioblastoma subclass RTK1 (pedGBM\_RTK1, n=5), pediatric glioblastoma subclass RTK2 (pedGBM\_RTK2, n=3) and pleiomorphic xanthoastrocytoma (PXA, n=8). Data are illustrated as boxplots with the middle lines as median and bounds of boxes illustrating the interquartile range. The x-axis illustrates the tumor entities and y-axis indicates expression levels logarithmically (log<sub>2</sub>). Lower and upper whiskers constrain data points between minimum and maximum. Outliers are depicted using individual data points beyond the whiskers. *OLIG2* Oligodendrocyte Transcription Factor 2, *GFAP* glial fibrillary acidic protein, *MAP2* Microtubule-associated protein 2, *MKI67* Marker of Proliferation Ki-67, *RBFOX3* RNA Binding Fox-1 Homolog 3, *SOX2* SRY-box transcription factor 2, *SYN* synapsin.

| New_RIG_ID | Methylation subgroup | Location          | Age category at diagnosis (RIG) | Gender (m/f) | Primary malignancy (type) | Latency (years) | death (y/n) | OS (months) | Methylation data available | Whole-exome data available | Gene panel data available | Matching blood sample available | RNA data available | Gene expression available | TP53 status                   | SETD2 status | Additional potentially relevant mutations |
|------------|----------------------|-------------------|---------------------------------|--------------|---------------------------|-----------------|-------------|-------------|----------------------------|----------------------------|---------------------------|---------------------------------|--------------------|---------------------------|-------------------------------|--------------|-------------------------------------------|
| RIG_01     | pedGBM_RTK1          | frontal lobe      | 11-15                           | m            | ALL                       | NA              | y           | 10          | x                          |                            |                           |                                 |                    |                           |                               |              |                                           |
| RIG_02     | pedGBM_RTK1          | left parietal     | 11-15                           | m            | ALL                       | 7               | y           | 6           | x                          | x                          |                           | x                               | x                  | x                         | p.226_227del                  | wt           |                                           |
| RIG_03     | pedGBM_RTK1          | parietal lobe     | 11-15                           | f            | ALL                       | 10              | y           | 3           | x                          |                            |                           |                                 |                    |                           |                               |              |                                           |
| RIG_04     | pedGBM_RTK1          | parietal lobe     | 11-15                           | m            | ALL                       | NA              | NA          | NA          | x                          | x                          |                           | x                               |                    |                           | wt                            | wt           | CBL (p.Y371H)                             |
| RIG_05     | pedGBM_RTK1          | left frontal      | 11-15                           | f            | ALL                       | 4               | NA          | NA          | x                          | x                          |                           | x                               |                    |                           | p.R248W                       | wt           | PDGFRA (p.L275S)                          |
| RIG_06     | pedGBM_RTK1          | frontal lobe      | 11-15                           | m            | ALL                       | 6               | NA          | NA          | x                          |                            |                           |                                 |                    |                           |                               |              |                                           |
| RIG_07     | pedGBM_RTK1          | cerebellum        | 11-15                           | f            | ALL                       | NA              | y           | 8.5         | x                          |                            |                           |                                 |                    |                           |                               |              |                                           |
| RIG_08     | PXA                  | parietal left     | 6-10                            | f            | ALL                       | 3               | NA          | NA          | x                          | x                          |                           | x                               | x                  | x                         | wt                            | wt           |                                           |
| RIG_09     | pedGBM_RTK1          | cerebellar        | 11-15                           | f            | MB Group4                 | 4               | y           | 8           | x                          | x                          |                           | x                               |                    |                           | wt                            | p.S1002fs    |                                           |
| RIG_10     | pedGBM_RTK1          | cerebellum        | 6-10                            | m            | MB Group3                 | 3               | y           | 3           | x                          | x                          | x                         | x                               | x                  | x                         | wt                            | wt           | NTRK2 (p.L806F)                           |
| RIG_11     | pedGBM_RTK1          | cerebellum        | 11-15                           | m            | MB Group4                 | 3               | NA          | NA          | x                          |                            |                           |                                 |                    |                           |                               |              |                                           |
| RIG_12     | PXA                  | temporal          | >21                             | m            | MB                        | 13              | y           | 10          | x                          | x                          |                           | x                               | x                  | x                         | p.G154fs                      | wt           |                                           |
| RIG_13     | pedGBM_RTK1          | NA                | 11-15                           | m            | MB SHH-AD                 | 4               | y           | 11          | x                          |                            |                           |                                 |                    |                           |                               |              |                                           |
| RIG_14     | pedGBM_RTK1          | cerebellum        | >21                             | m            | MB                        | NA              | n           | 18          | x                          | x                          |                           | x                               | x                  | x                         | wt                            | wt           | PDGFRA (p.D143N)                          |
| RIG_15     | pedGBM_RTK1          | cerebellum        | 16-20                           | m            | MB                        | 9               | NA          | NA          | x                          |                            |                           |                                 |                    |                           |                               |              |                                           |
| RIG_16     | pedGBM_RTK1          | cerebellum        | 0-5                             | m            | MB                        | 1.5             | NA          | NA          | x                          |                            |                           |                                 |                    |                           |                               |              |                                           |
| RIG_17     | pedGBM_RTK1          | cerebellum        | >21                             | f            | MB                        | 10              | NA          | NA          | x                          |                            | x                         |                                 |                    |                           | wt                            | wt           | EGFR (p.D1051H)                           |
| RIG_18     | pedGBM_RTK1          | parieto-occipital | 11-15                           | f            | MB                        | NA              | NA          | NA          | x                          | x                          |                           | x                               |                    |                           | wt                            | wt           |                                           |
| RIG_19     | pedGBM_RTK1          | cerebellum        | 11-15                           | f            | MB                        | 6               | NA          | NA          | x                          |                            |                           |                                 |                    |                           |                               |              |                                           |
| RIG_20     | PXA                  | cerebellum        | 11-15                           | m            | MB                        | 3               | y           | 5           | x                          |                            |                           |                                 |                    |                           |                               |              |                                           |
| RIG_21     | PXA                  | cerebellum        | 11-15                           | f            | MB                        | NA              | NA          | NA          | x                          |                            |                           |                                 |                    |                           |                               |              |                                           |
| RIG_22     | pedGBM_RTK1          | cerebellum        | 0-5                             | f            | MB                        | NA              | NA          | NA          | x                          |                            |                           |                                 |                    |                           |                               |              |                                           |
| RIG_23     | pedGBM_RTK1          | cerebellum        | >21                             | m            | MB                        | 14              | y           | 9           | x                          | x                          |                           | x                               | x                  |                           | wt                            | p.N1396fs    | RAF1 (p.S246A)                            |
| RIG_24     | pedGBM_RTK1          | frontal lobe      | >21                             | f            | MB                        | 15              | y           | 2           | x                          | x                          |                           | x                               | x                  | x                         | wt                            | p.G720fs     | NF1 (p.W1931X)                            |
| RIG_25     | pedGBM_RTK1          | cerebellum        | 16-20                           | f            | MB                        | 4               | y           | 4           | x                          | x                          |                           | x                               | x                  | x                         | p.A276G, c.97-1G>T (germline) | wt           | ATRX (p.S1108X)                           |
| RIG_26     | pedGBM_RTK1          | cerebellum        | >21                             | m            | MB                        | NA              | NA          | NA          | x                          |                            |                           |                                 |                    |                           |                               |              |                                           |
| RIG_27     | pedGBM_RTK1          | cerebellum        | 6-10                            | m            | MB Group3                 | 6               | y           | 9           | x                          |                            | x                         |                                 |                    |                           | wt                            | wt           | BCOR (p.P670A)                            |
| RIG_28     | pedGBM_RTK1          | cerebellum        | >21                             | m            | MB Group4                 | 9               | NA          | NA          | x                          |                            |                           |                                 |                    |                           |                               |              |                                           |
| RIG_29     | pedGBM_RTK1          | cerebellum        | 6-10                            | f            | MB SHH-INF                | 4               | y           | 8           | x                          |                            | x                         |                                 |                    |                           | wt                            | wt           |                                           |
| RIG_30     | pedGBM_RTK1          | cerebellum        | 11-15                           | f            | MB SHH-AD                 | 2.5             | y           | 11          | x                          |                            |                           |                                 |                    |                           | wt                            | wt           |                                           |
| RIG_31     | pedGBM_RTK1          | cerebellum        | 11-15                           | f            | MB Group4                 | 5               | n           | 3           | x                          |                            | x                         |                                 |                    |                           | wt                            | wt           |                                           |
| RIG_32     | pedGBM_RTK1          | cerebellum        | 16-20                           | m            | MB WNT                    | 3               | y           | 15          | x                          |                            |                           |                                 |                    |                           |                               |              |                                           |
| RIG_33     | pedGBM_RTK1          | cerebellum        | >21                             | m            | MB Group4                 | 10              | y           | 7           | x                          |                            |                           |                                 |                    |                           |                               |              |                                           |

**Supplementary Table 1.** Summary of clinical patient data, TP53- and SETD2-status. MB medulloblastoma, MB-WNT medulloblastoma WNT subgroup, MB-SHH-INF medulloblastoma sonic-hedgehog infant subgroup, MB-SHH-AD medulloblastoma sonic-hedgehog adult subgroup, PXA pleiomorphic xanthoastrocytoma, pedGBM\_RTK1 pediatric glioblastoma subclass RTK1, NA not applicable, OS overall survival, wt wildtype.

| <b>RIG_ID</b> | <b>EGA-ID</b> |
|---------------|---------------|
| RIG_02        | INF_R_148     |
| RIG_08        | INF_R_490     |
| RIG_09        | INF_R_1540    |
| RIG_11        | INF_P_51      |
| RIG_13        | INF_R_013     |
| RIG_15        | INF_R_118     |
| RIG_23        | INF_R_223     |
| RIG_24        | INF_R_212     |
| RIG_25        | INF_R_431     |

**Supplementary Table 2.** Matching RIG\_XX to the EGA-IDs for the INFORM project INF\_X\_XXX (EGAS00001005243).
